# Supplementary material for: Altitudinal patterns and controls of plant and soil nutrient concentrations and stoichiometry in subtropical China
Source: Springer Nature journal article supplement (doi:10.1038/srep24261), 2016-04-07
Supplement: 41598_2016_BFsrep24261_MOESM1_ESM.pdf [file 41598_2016_BFsrep24261_MOESM1_ESM.pdf]

# Altitudinal patterns and controls of plant and soil nutrient contents and stoichiometry in subtropical China

Xianjin He<sup>1 2†</sup>, Enqing Hou<sup>1†</sup>, Yang liu<sup>1 2</sup>, Dazhi Wen<sup>1\*</sup>

1 Key Laboratory of Vegetation Restoration and Management of Degraded Ecosystems,  
South China Botanical Garden, Chinese Academy of Sciences, Guangzhou, China

2 University of Chinese Academy of Sciences, Beijing, China

\*Corresponding author; email: [dzwen@scbg.ac.cn](mailto:dzwen@scbg.ac.cn)

† These authors contributed equally to this work.

## Supplementary information

Table S1: Basic information for the 19 forest plots along an altitude gradient in the Dinghushan Biosphere Reserve, South China.

| Plot number | Altitude (m) | Slope | Community height (m) | Vegetation type                       | Dominant species                                                                                                                      |
|-------------|--------------|-------|----------------------|---------------------------------------|---------------------------------------------------------------------------------------------------------------------------------------|
| 1           | 45           | 15 °  | 25                   | Coniferous & broadleaved mixed forest | <i>Pinus massoniana</i> ; <i>Eucalyptus robusta</i> ; <i>Astanopsis fissa</i>                                                         |
| 2           | 86           | 30 °  | 23                   | Ravine rainforest                     | <i>Ficus nervosa</i> ; <i>Caryota Ochlandra</i> ; <i>Cryptocarya chinensis</i> .                                                      |
| 3           | 143          | 25 °  | 24                   |                                       |                                                                                                                                       |
| 4           | 201          | 20 °  | 20                   | Evergreen broadleaved forest          | <i>C. chinensis</i> ; <i>Schima superba</i> ; <i>Cryptocarya concinna</i> ; <i>Lindera chunii</i> .                                   |
| 5           | 250          | 32 °  | 19                   |                                       |                                                                                                                                       |
| 6           | 289          | 30 °  | 20                   | Coniferous & broadleaved mixed forest | <i>Schima superba</i> ; <i>C. chinensis</i> ; <i>P. massoniana</i> ; <i>Craibiodendron kwangtungense</i> ; <i>Castanopsis fissa</i> . |
| 7           | 355          | 15 °  | 12                   |                                       |                                                                                                                                       |
| 8           | 388          | 30 °  | 15                   |                                       |                                                                                                                                       |
| 9           | 453          | 30 °  | 13                   |                                       |                                                                                                                                       |
| 10          | 499          | 32 °  | 15                   |                                       |                                                                                                                                       |
| 11          | 552          | 15 °  | 10                   |                                       |                                                                                                                                       |
| 12          | 596          | 25 °  | 6                    |                                       |                                                                                                                                       |
| 13          | 648          | 30 °  | 7                    | Mountainous evergreen broadleaved     | <i>Engelhardtia chrysolepis</i> , <i>Bridelia monoica</i> ,                                                                           |

|    |     |      |     |            |                                                                                     |
|----|-----|------|-----|------------|-------------------------------------------------------------------------------------|
|    |     |      |     | forest     | <i>Machilus velutina; Rhododendron sinai.</i>                                       |
| 14 | 700 | 15 ° | 4   |            |                                                                                     |
| 15 | 750 | 15 ° | 5   |            |                                                                                     |
| 16 | 800 | 30 ° | 4.5 | Tall shrub | <i>R. sinai; Corydalis pallida.</i>                                                 |
| 17 | 849 | 25 ° | 2   |            |                                                                                     |
| 18 | 893 | 15 ° | 2.5 | Low shrub  | <i>Rhododendron simsii; C. pallid; Aristida chinensis;<br/>Eriachne pallescens.</i> |
| 19 | 944 | 5 °  | 1.5 |            |                                                                                     |

---
